# Supplementary material
Source: HighWire-hosted journal article supplement (https://bjsm.bmj.com/content/53/17/1048)
Supplement: inline-supplementary-material-1 [file inline-supplementary-material-1.docx]

**Supplementary Table 1: Methodology to identify the source information used by the consensus group**

The consensus group identified source information papers by conducting a literature review (MS, JB, MB) in the electronic database PubMed using the following search terms:

*Cardiac arrest [Abstract] OR sudden death [Abstract] OR medical complication [Abstract] OR medical encounter [Abstract) AND endurance sport [Abstract] OR endurance race [Abstract] OR running [Abstract] OR marathon [Abstract] OR half-marathon [Abstract] OR athletics [Abstract] OR cycling [Abstract] OR swimming [Abstract] OR aquatic [Abstract] OR triathlon [Abstract] OR biathlon [Abstract] OR duathlon [Abstract] OR canoeing [Abstract] OR kayaking [Abstract] OR cross country skiing [Abstract]*

The search was finalised in May 2018 and the initial search retrieved 2685 papers. The following exclusion criteria were then applied to select the core references that the consensus group considered in generating this consensus document:

- Not human participants
- Papers not in the English language or papers not translated into the English language
- Papers describing case reports or case series
- Studies not documenting medical encounters / complications during sport
- Studies not documenting medical encounters during mass community-based endurance sports events
- Articles focusing on prevention, screening, causes and outcomes (including reviews, consensus documents, editorials or letters with no data or information on definitions, classifications of illness or injuries, research methodology, or data collection procedures at mass community-based endurance sports events)

A total of 87 original research papers formed the core resource material for the scientific base for this consensus document. However, the senior authors also included material from articles focusing on prevention, screening, causes and outcomes (465 articles) and reviews (300 articles) as additional resource material for this consensus document (Figure 1 - below). Three members of the consensus group (MS, JB and MB) reviewed the source material and extracted data related to aspects in the consensus as follows: definitions, diagnostic categories of illness- and injury-related medical encounters, data collection procedures, and data reporting. This enabled the consensus group to identify a wide variety of methodological approaches to all aspects in this consensus document including definitions, diagnostic categories of illness- and injury-related medical encounters, data collection, and data reporting. The various methodological approaches in the body of literature were carefully considered and debated by the group, in order to generate the consensus document.

**Figure 1: Search methodology and final selection of articles included as core and additional resource material for the consensus**

**Core material**

**87 original research studies at endurance events** were included in the source information papers that was considered by the group

Source information papers was identified by conducting a literature search in the electronic database PubMed, using the following search terms:

*Cardiac arrest [Abstract] OR sudden death [Abstract] OR medical complication [Abstract] OR medical encounter [Abstract) AND endurance sport [Abstract] OR endurance race [Abstract] OR running [Abstract] OR marathon [Abstract] OR half-marathon [Abstract] OR athletics [Abstract] OR cycling [Abstract] OR swimming [Abstract] OR aquatic [Abstract] OR triathlon [Abstract] OR biathlon [Abstract] OR duathlon [Abstract] OR canoeing [Abstract] OR kayaking [Abstract] OR cross country skiing [Abstract] until* May 2018.

**Initial search retrieved 2685 papers**

The following exclusion criteria were then applied:

- Not human participants,
- Not English language or translated into the English language,
- Case reports or case series,
- Studies not documenting medical encounters / complications during sport

**1681 papers were excluded**

Studies not documenting medical encounters during mass-community based endurance sports events

**152 papers were excluded**

**Additional material**

**465 articles focusing on prevention, screening, causes and outcomes** were included in the source information papers that was considered by the group

**Additional material**

**300 reviews, consensus documents, editorials or letters** were included because they contained data or information on definitions, classifications of illness or injuries, research methodology, and data collection procedures at mass-community based endurance sports events
