# Supplementary material
Source: HighWire-hosted journal article supplement (https://bjsm.bmj.com/content/53/17/1048)
Supplement: inline-supplementary-material-3 [file inline-supplementary-material-3.docx]

**Supplementary Table 3: Diagnostic categories of illness-related medical encounters by main organ system and more common specific types / diagnosis of medical encounters (modified from OSCIS 10.1)**

| **Main organ system** | **Illness type / diagnosis** |
| --- | --- |
| Multiple organ systems |  |
|  | Heat Illness |
|  | Hypothermia |
|  | Hyperthermia / exertional heat stroke |
|  | Sunburn |
|  | Rhabdomyolysis |
|  | Fluid and electrolyte disorders |
|  | Dehydration (mild: <5% body weight loss) |
|  | (moderate: >5% to <7 % body weight loss) |
|  | (severe: >7% body weight loss) |
|  | Hyponatraemia |
|  | Acid-base disorders |
|  | Other electrolyte disorders |
|  | Infection |
|  | Systemic Infection (excluding pathogens localised to one area) |
| Cardiovascular system |  |
|  | Exercise Associated Postural Hypotension (EAPH) |
|  | Syncope (non-specific) |
|  | Chest pain (non-specific) |
|  | Ischaemic heart disease |
|  | Acute coronary syndrome (myocardial infarction, angina) |
|  | Stable angina |
|  | Cardiac arrest |
|  | Sudden cardiac death |
|  | Cardiac arrest (successfully resuscitated) |
|  | Conduction abnormality including arrhythmias |
|  | Supraventricular tachycardia |
|  | Ventricular tachycardia |
|  | Frequent ventricular extra-systoles |
|  | Other significant arrhythmia |
|  | Other abnormality on ECG (including non-specific) |
|  | Congestive heart failure |
|  | Hypertrophic cardiomyopathy and other cardiomyopathies |
|  | Other congenital/inherited cardiovascular disease |
|  | Murmurs/ Valvular disease |
|  | Acute myocarditis (viral) |
|  | Acute pericarditis |
|  | Venous disease |
|  | Deep venous thrombosis |
|  | Other venous disease including calf / ankle oedema, cause unknown |
|  | Peripheral vascular disease |
|  | Other cardiovascular disease |
| Respiratory disease and ENT (ear, nose / throat) systems |  |
|  | Respiratory tract infection (bacterial or viral) |
|  | Other upper respiratory tract infection |
|  | Other lower respiratory tract infection |
|  | Asthma and/or allergy |
|  | Allergy - rhinitis/ sinusitis/ hay fever (for urticaria see MDUX) |
|  | Asthma - allergic |
|  | Asthma - exercise induced only |
|  | Pneumothorax |
|  | Acute pulmonary embolus |
|  | Vocal cord dysfunction |
|  | Other respiratory illness not otherwise specified |
| Central nervous system (CNS) |  |
|  | Exercise Associated Muscle Cramps (EAMC) |
|  | Mild EAMC (localised, no altered mental status, no systemic symptoms) |
|  | Severe EAMC (generalized, altered mental status or with systemic symptoms |
|  | Dizziness/nausea (non-specific) |
|  | Coma (cause unknown) |
|  | Confusion (non-specific) |
|  | Stroke / Cerebrovascular Accident (CVA) |
|  | Epilepsy |
|  | Headaches |
|  | Exercise related headache |
|  | Migraine |
|  | Cluster headaches |
|  | Headache not otherwise specified |
|  | Other neurological problem |
|  | Generalised tight muscles/ spasticity |
|  |  |
| Rheumatological system |  |
|  | Joint pain (non-specific) |
|  | Joint infection - septic arthritis (excluding complications of surgery or perforating lacerations) |
|  | Infection of bone - osteomyelitis |
|  | Osteoarthritis (OA) - generalised (not isolated to one joint) |
|  | Gout |
|  | Pseudogout |
|  | Seronegative arthritis |
|  | Rheumatoid arthritis |
|  | Fibromyalgia/ multiple sore muscle areas |
|  | Rheumatological disease other/ undiagnosed |
| Gastrointestinal system |  |
|  | Nausea / vomiting (non-specific) |
|  | Abdominal pain (non-specific) |
|  | Gastrointestinal infection |
|  | Gastroenteritis (including food poisoning) |
|  | Other gastrointestinal infection |
|  | Gastritis |
|  | Exercise associated gastritis/ reflux |
|  | Non-steroidal anti-inflammatory drug (NSAID) associated gastritis/ peptic ulceration |
|  | Gastritis/ peptic ulceration - non exercise/ NSAID related |
|  | Diarrhoea |
|  | Runner's diarrhoea |
|  | Gastrointestinal bleeding (upper gastrointestinal tract) including hematemesis |
|  | Gastrointestinal bleeding (lower gastrointestinal tract) including melena |
|  | Surgical bowel problem (acute bowel) |
|  | Other gastrointestinal illness |
|  |  |
| Genitourinary system (excluding infections) | |
|  | Genitourinary infection |
|  | Cystitis |
|  | Other genitourinary infection |
|  | Acute kidney injury |
|  | Acute renal failure |
|  | Other urinary Illness |
|  | Haematuria |
|  | Pregnancy |
| Haematological system and Nutritional Deficiencies | |
|  | Anaemia |
|  | Sickle-cell trait |
| Endocrine / Metabolic system |  |
|  | Thyroid disorder |
|  | Hypothyroid |
|  | Hyperthyroid |
|  | Hypoglycaemia (non-specific) |
|  | Diabetes mellitus |
|  | Type I (insulin dependent) |
|  | Type II (non-insulin dependent) |
|  | Other endocrine disorder |
| Dermatological system (excluding infections, skin lesions/ tumours and sunburn MVHX) | |
|  | Sunburn |
|  | Skin Infection/ Cellulitis/ Abscess/ Infected Bursa |
|  | Skin chafing / blister |
|  | Abrasion |
|  | Laceration |
|  | Urticaria |
|  | Dermatitis |
|  | Other rash not otherwise mentioned or undiagnosed |
| Ophthalmological system (excluding trauma) | |
| Dental illness | |
| Psychological / psychiatric illness | |
|  | Anxiety/ panic disorder, including hyperventilation |
|  | Other psychological/ psychiatric disorder not otherwise specified |
| Tumours / malignancies |  |
| Drug use/ Overdose/ Poisoning | |
| Medical Illness (Other or undiagnosed) | |
|  | Tired athlete (non-specific) |
|  | Other medical illness |
